# Supplementary material
Source: PubMed Central journal article supplement (PMC6154443)
Supplement: Supp_Fig1.pdf [file Supp_Fig1.pdf]

## Supplementary Data

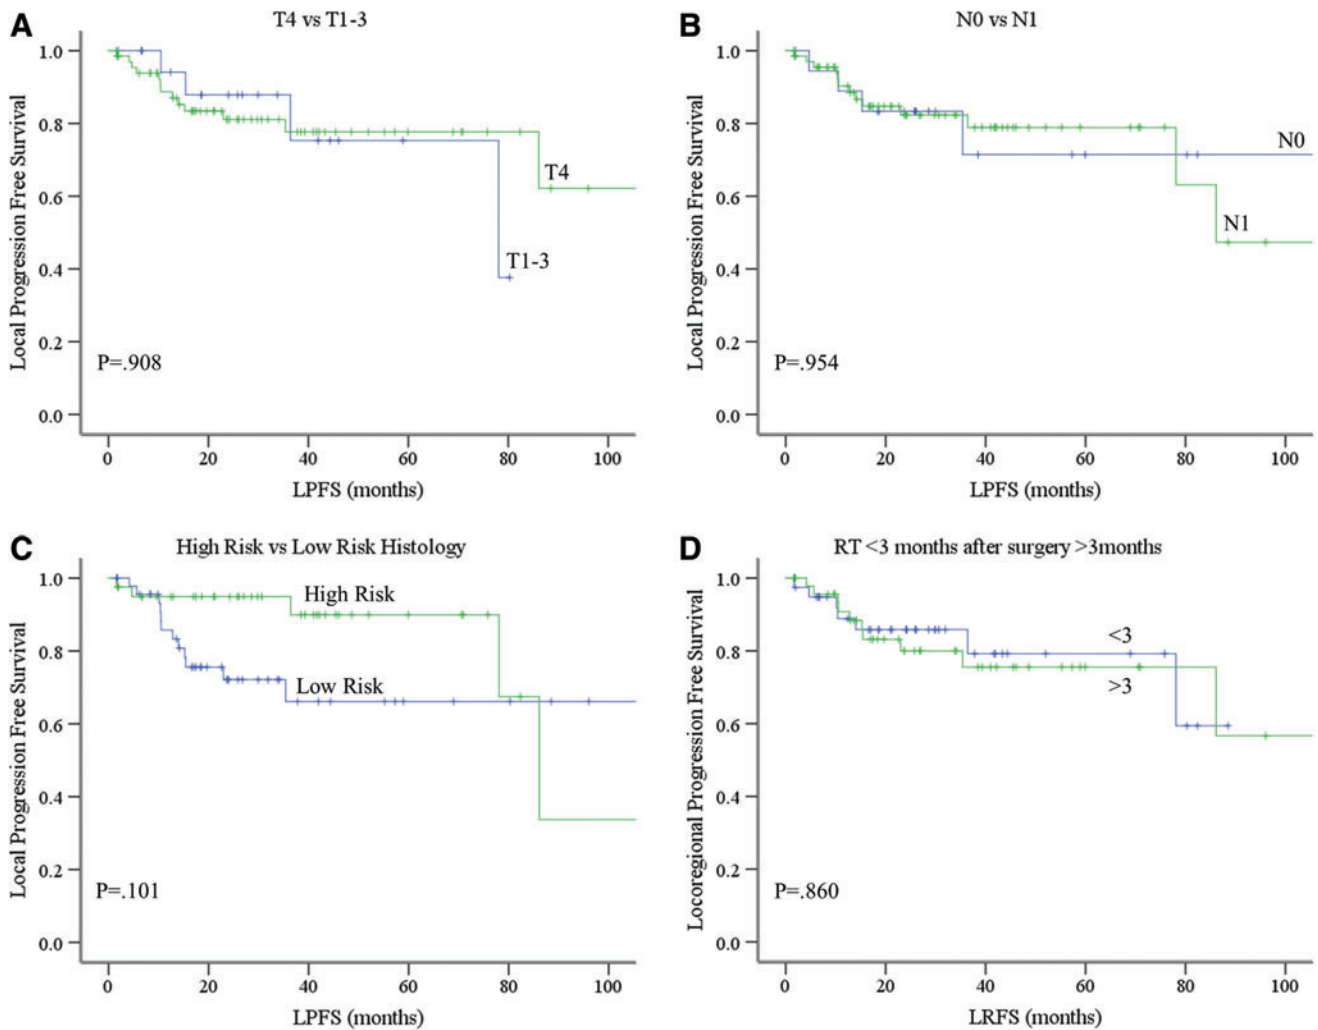

**SUPPLEMENTARY FIG. S1.** Kaplan-Meier estimates of locoregional progression free survival. (A) Kaplan-Meier estimate of locoregional progression free survival based on T1–T3 versus T4 tumor stage status. Blue line represents T1-3 status and green line T4 status ( $p=0.908$ ). (B) Kaplan-Meier estimate of locoregional progression free survival based on N0 node status versus N1 status. Blue line represents N0 status and green line N1 status ( $p=0.954$ ). (C) Kaplan-Meier estimate of locoregional progression free survival based on low risk versus high risk pathology status. Blue line represents low risk and green line high risk status ( $p=0.101$ ). (D) Kaplan-Meier estimate of locoregional progression free survival based on RT  $\leq 3$  months versus  $>3$  months. Blue line represents  $\leq 3$  months and green line  $>3$  months ( $p=0.795$ ).
