# Supplementary material
Source: PubMed Central journal article supplement (PMC6154443)
Supplement: Supp_Fig3.pdf [file Supp_Fig3.pdf]

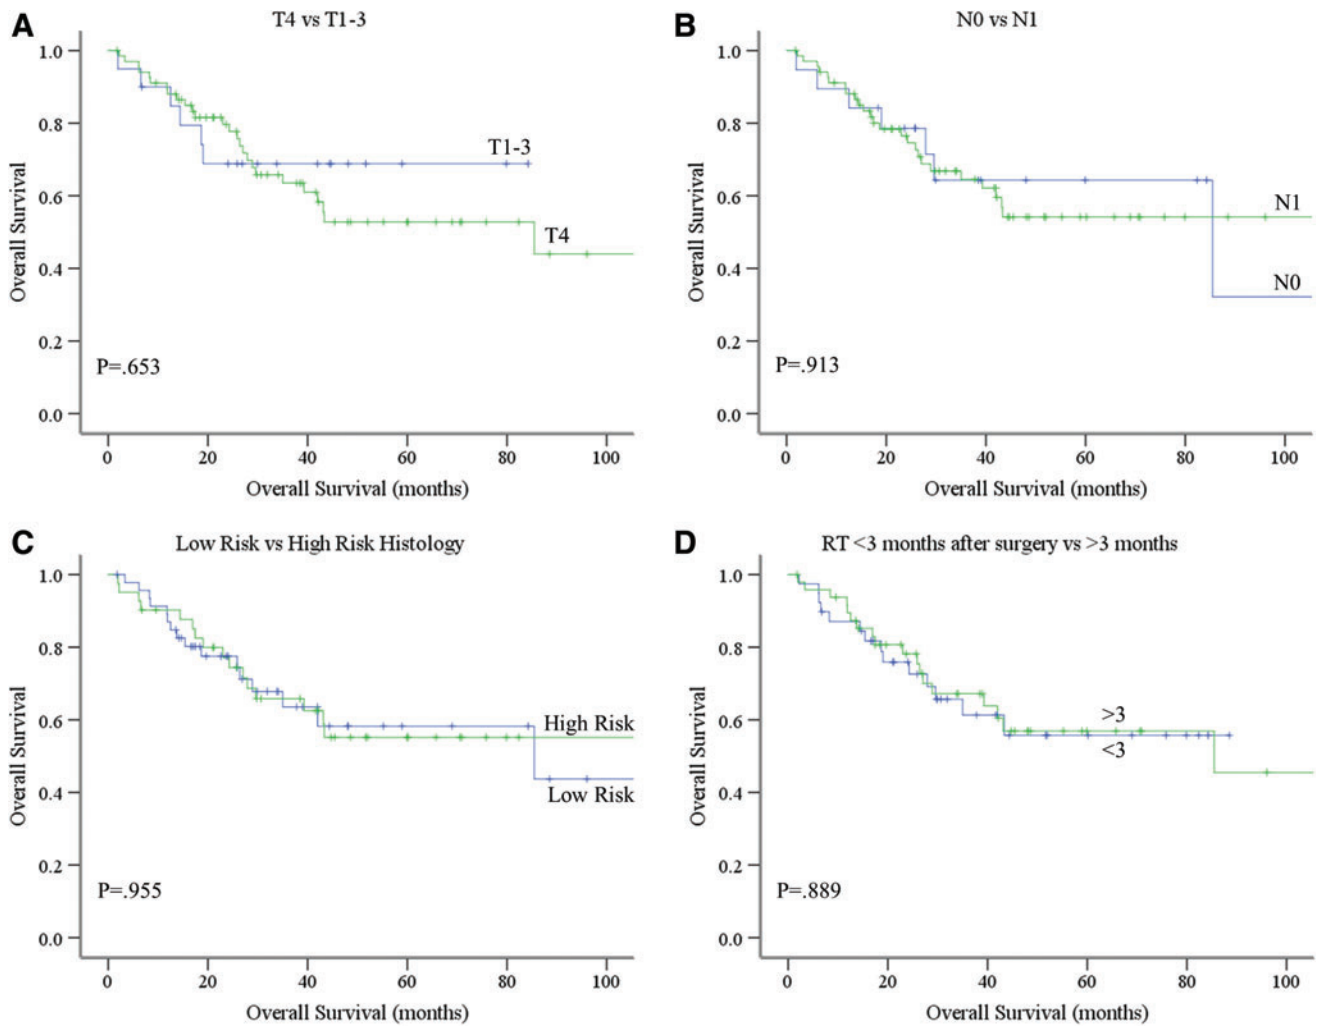

**SUPPLEMENTARY FIG. S3.** Kaplan–Meier estimates of distant metastases free survival. **(A)** Kaplan–Meier estimate of overall survival based on T1–T3 versus T4 status. Blue line, T1–T3 status; green line, T4 status ( $p=0.653$ ). **(B)** Kaplan–Meier estimate of overall survival based on N0 status versus N1 status. Blue line, N0 status; green line, N1 status ( $p=0.913$ ). **(C)** Kaplan–Meier estimate of overall survival based on low risk versus high risk pathology status. Blue line, low risk; green line, high risk status ( $p=0.955$ ). **(D)** Kaplan–Meier estimate of overall survival based on RT  $\leq 3$  months versus  $>3$  months. Blue line,  $\leq 3$  months; green line,  $>3$  months ( $p=0.889$ ).
